# Supplementary material for: Optimization of a QuEChERS method for 15 pesticides followed by determination the transport behavior in cowpea-soil system
Source: Research Square preprint supplement (doi:10.21203/rs.3.rs-5625297/v1), 2024-12-19
Supplement: Supplementary file 1 [file e35783143e948540ee994b2f.docx]

Optimization of a QuEChERS method for 15 pesticides followed by determination the transport behavior in cowpea-soil system

Jiazhen Wu*#*, Yufei Li*#*, Xingsheng Yue1, Xingyue Li1, Kai Guo3, Ye Yang1, Meng Wang1, 2, Xiaoyu Liang1, 2, Shanying Zhang1, 2*, Yu Zhang1, 2*

*1 Sanya Nanfan Research Institute of Hainan University, School of Tropical Agriculture and Forestry (School of Agricultural and Rural Affairs, School of Rural Revitalization), Hainan University, Haikou, 570228, P. R. China*

*2 Key Laboratory of Tropical Fruits and Vegetables Quality and Safety for State Market Regulation, Hainan University, Haikou, 570228, P. R. China*

*3 College of Food science and Engineering, Hainan University, 570228, Haikou, P. R. China*

*#These authors contributed equally to this article*

**Corresponding authors E-mail addre*sses: 17889986721@163.com (S. Zhang), yuzhang_rain@163.com (Y. Zhang)

Table S1 5 kinds of soil physical and chemical properties

| Soil type | OM  (organic matter) (g/kg) | CEC  (cation exchange capacity) (cmo/L） | Sand (%) | Silt (%) | Clay (%) | pH |
| --- | --- | --- | --- | --- | --- | --- |
| Red soil | 5.15±0.18 | 5.40±0.18 | 56.88±1.05 | 16.93±0.93 | 26.20±0.95 | 6.55±1.15 |
| Yellow soil | 24.4±0.17 | 3.45±1.21 | 79.70±1.71 | 14.63±1.27 | 5.67±0.45 | 6.90±0.11 |
| Sandy soil | 1.37±0.25 | 14.98±1.94 | 59.37±0.57 | 26.07±2.28 | 14.57±2.29 | 7.20±0.11 |
| Sandy loam soil | 14.0±0.37 | 3.49±0.37 | 80.30±0.98 | 13.97±0.61 | 5.73±0.38 | 5.71±0.04 |
| Paddy soil | 12.5±0.40 | 2.28±0.66 | 84.80±0.10 | 11.10±0.30 | 4.03±0.35 | 7.95±0.08 |

Table S2 Gas chromatography tandem mass spectrometry 10 pesticides full scan warming program

| Speed  (℃/min) | Target value  (℃) | Retention time  (min) |
| --- | --- | --- |
|  | 80℃ | 2 min |
| 25℃ | 250℃ | 8 min |
| 30℃ | 300℃ | 5 min |

Table S3 Retention time and screening information for 15 pesticides

| Pesticides | Retention period  (min) | R2 | Standard curve |
| --- | --- | --- | --- |
| cyromazine | 8.42 | 0.998 | y = 164186x - 6958.2 |
| metalaxyl | 9.06 | 0.999 | y = 173989x - 4338.1 |
| chlorpyrifos | 9.37 | 0.999 | y = 390747x - 6034.6 |
| fluopyram | 9.77 | 0.999 | y = 1E+06x - 53924 |
| chlorfenapyr | 10.7 | 0.998 | y = 42130x - 1629.5 |
| tebuconazole | 12.14 | 0.999 | y = 344735x - 18565 |
| pyraclostrobin | 19.67 | 0.999 | y = 135122x - 15325 |
| difenoconazole | 19.75 | 0.999 | y = 274003x - 20647 |
| azoxystrobin | 20.27 | 0.996 | y = 130649x - 18897 |
| dimethomorph | 20.44 | 0.995 | y = 11082x - 2339.8 |
| thiamethoxam | 4.947 | 0.999 | y = 22361x + 610.61 |
| imidacloprid | 6.303 | 0.999 | y = 49562x + 1181.3 |
| acetamiprid | 7.896 | 0.999 | y = 19953x - 141.02 |
| carbendazim | 11.697 | 0.999 | y = 23627x - 604.57 |
| chlorantraniliprole | 11.735 | 0.999 | y = 23123x - 444.35 |

Table S4 Recovery rates of 15 pesticides in cowpea matrix

| Pesticides Matrix | Addition level（mg/kg) | cyromazine | metalaxyl | chlorpyrifos | fluopyram | chlorfenapyr | tebuconazole | pyraclostrobin | difenoconazole | azoxystrobin | dimethomorph | thiamethoxam | imidacloprid | acetamiprid | carbendazim | chlorantraniliprole |
| --- | --- | --- | --- | --- | --- | --- | --- | --- | --- | --- | --- | --- | --- | --- | --- | --- |
| Root | 1 | 83.39 | 92.37 | 104.51 | 96.14 | 90.89 | 91.24 | 82.06 | 94.58 | 87.49 | 86.2 | 109.54 | 109.54 | 105.62 | 100.33 | 100 |
|  | 0.1 | 115.26 | 89.02 | 95 | 90.42 | 77.96 | 94.03 | 90.46 | 93.53 | 119.5 | 87.87 | 117.58 | 111.22 | 116.98 | 96.02 | 81.71 |
|  | 0.01 | 114.44 | 95.76 | 114.44 | 118.46 | 111.8 | 115.26 | 94.34 | 80.88 | 111.67 | 116.36 | 100.07 | 100.23 | 100.06 | 100.38 | 113.67 |
| RSD (%) | 1 | 9.02 | 8.29 | 11.1 | 12.35 | 7.25 | 6.73 | 11.54 | 2.97 | 8.3 | 6.14 | 6.34 | 6.34 | 8.64 | 11.67 | 5.24 |
|  | 0.1 | 2.9 | 1.08 | 1.7 | 1.71 | 0.87 | 2.33 | 5.38 | 2.24 | 6.67 | 4.28 | 1.48 | 1.72 | 5.1 | 6.6 | 7.21 |
|  | 0.01 | 0.92 | 2.82 | 4.97 | 8.63 | 7.52 | 3.24 | 3.04 | 2.87 | 1.46 | 2.82 | 0.53 | 0.48 | 1.8 | 1.91 | 3.15 |
| Stem | 1 | 100.41 | 88.91 | 99.18 | 92.8 | 90.56 | 90.35 | 94.03 | 92.43 | 94.14 | 94.23 | 94.67 | 92.84 | 105.04 | 86.99 | 105.02 |
|  | 0.1 | 114.25 | 93.66 | 90.01 | 93.65 | 98.11 | 90.86 | 91.04 | 94.38 | 93.29 | 93.17 | 96.18 | 94.97 | 89.73 | 114.41 | 107.46 |
|  | 0.01 | 84.25 | 87.69 | 77.99 | 78.45 | 80.47 | 77.88 | 88.61 | 83.75 | 83.97 | 96.91 | 75.97 | 77.91 | 80.14 | 74.15 | 74.89 |
| RSD (%) | 1 | 12.23 | 1.7 | 2.71 | 1.88 | 2.24 | 3.49 | 0.3 | 5.42 | 5.11 | 1.75 | 9.15 | 5.57 | 14.91 | 13.76 | 1.88 |
|  | 0.1 | 6.5 | 1.51 | 10.76 | 11.41 | 10.88 | 9.14 | 10.55 | 5.66 | 4.14 | 4.3 | 3.46 | 2.14 | 2.98 | 4.48 | 7.38 |
|  | 0.01 | 3.22 | 11.51 | 10.76 | 11.41 | 10.88 | 11.14 | 11.55 | 12.66 | 14.14 | 14.3 | 6.03 | 0.38 | 4.26 | 2.02 | 6.91 |
| Leaf | 1 | 97.08 | 97.62 | 110.2 | 100.63 | 90.36 | 79.86 | 90.81 | 98.75 | 87.83 | 98.15 | 106.01 | 101.61 | 110.37 | 105.11 | 97.52 |
|  | 0.1 | 104.88 | 81.09 | 94.35 | 118.74 | 115.19 | 115.11 | 94.71 | 106.06 | 114.48 | 104.81 | 115.4 | 103 | 103.69 | 85.42 | 77.57 |
|  | 0.01 | 99.3 | 101.75 | 101.89 | 102.43 | 100.67 | 99.82 | 98.38 | 98.75 | 100.03 | 93.86 | 85.53 | 74.92 | 111.63 | 111.04 | 79.29 |
| RSD (%) | 1 | 8.58 | 5.74 | 7.14 | 6.83 | 6.03 | 7.23 | 16.48 | 18.36 | 10.67 | 16.29 | 10.67 | 8.06 | 7.95 | 13.43 | 2.44 |
|  | 0.1 | 4.64 | 1.16 | 1.98 | 5.42 | 3.84 | 5.17 | 9.46 | 2.88 | 6.45 | 7.29 | 3.19 | 2.24 | 1.93 | 1.24 | 3.19 |
|  | 0.01 | 6.66 | 11.12 | 10.73 | 10.97 | 11.12 | 10.4 | 11.65 | 8.98 | 10.05 | 6.92 | 2.06 | 4.12 | 5.46 | 2.69 | 4.89 |

Table S5 Recovery rates of 15 pesticides in 5 soil matrices

| Pesticides Matrix | Addition level (mg/kg) | cyromazine | metalaxyl | chlorpyrifos | fluopyram | chlorfenapyr | tebuconazole | pyraclostrobin | difenoconazole | azoxystrobin | dimethomorph | thiamethoxam | imidacloprid | acetamiprid | carbendazim | chlorantraniliprole |
| --- | --- | --- | --- | --- | --- | --- | --- | --- | --- | --- | --- | --- | --- | --- | --- | --- |
| Red soil | 0.1 | 103.53 | 110.96 | 109.29 | 105.90 | 114.00 | 109.89 | 104.95 | 113.86 | 108.32 | 95.80 | 100.48 | 104.54 | 79.80 | 100.65 | 73.48 |
| 1 | 70.33 | 87.35 | 79.98 | 92.12 | 90.06 | 90.03 | 59.31 | 92.96 | 93.47 | 93.51 | 92.12 | 93.25 | 93.36 | 91.46 | 96.55 |
| 10 | 84.95 | 85.28 | 85.01 | 72.63 | 97.85 | 79.03 | 70.26 | 71.23 | 90.19 | 92.61 | 78.69 | 83.34 | 87.08 | 111.45 | 90.06 |
| RSD (%) | 0.1 | 2.94 | 9.09 | 6.01 | 3.58 | 10.09 | 3.06 | 12.46 | 7.92 | 5.37 | 6.55 | 5.71 | 4.54 | 5.92 | 7.53 | 1.88 |
| 1 | 3.55 | 2.94 | 3.76 | 2.16 | 2.06 | 3.58 | 18.94 | 3.53 | 6.38 | 2.87 | 1.25 | 1.17 | 1.72 | 1.44 | 6.36 |
| 10 | 2.16 | 8.09 | 6.15 | 6.06 | 10.60 | 5.43 | 4.16 | 3.02 | 11.37 | 7.34 | 0.34 | 0.43 | 1.10 | 5.17 | 0.41 |
| Yellow soil | 0.1 | 98.70 | 87.85 | 97.82 | 85.98 | 112.34 | 103.09 | 108.84 | 108.67 | 118.27 | 91.43 | 98.91 | 79.22 | 105.83 | 109.40 | 91.89 |
| 1 | 76.64 | 92.13 | 93.50 | 108.98 | 109.34 | 91.13 | 75.73 | 83.58 | 104.85 | 85.10 | 87.36 | 85.17 | 83.81 | 79.13 | 89.14 |
| 10 | 90.04 | 83.00 | 88.18 | 90.59 | 96.28 | 78.07 | 88.08 | 90.48 | 79.19 | 103.67 | 80.86 | 87.93 | 91.70 | 116.36 | 90.92 |
| RSD (%) | 0.1 | 4.68 | 3.28 | 3.74 | 9.45 | 15.97 | 3.23 | 10.07 | 10.88 | 1.44 | 4.95 | 4.25 | 6.93 | 0.65 | 7.10 | 7.04 |
| 1 | 3.47 | 4.00 | 4.71 | 2.79 | 4.32 | 3.97 | 8.45 | 5.66 | 4.89 | 3.86 | 3.10 | 2.07 | 2.53 | 2.00 | 8.42 |
| 10 | 4.44 | 4.08 | 3.45 | 5.24 | 4.48 | 4.37 | 10.14 | 7.31 | 7.55 | 6.88 | 1.76 | 2.52 | 3.64 | 2.39 | 0.18 |
| Sandy soil | 0.1 | 116.67 | 118.63 | 115.51 | 116.81 | 115.10 | 95.89 | 92.41 | 83.05 | 98.99 | 94.44 | 110.02 | 106.12 | 108.19 | 115.14 | 88.38 |
| 1 | 78.07 | 92.24 | 98.41 | 102.20 | 100.47 | 99.66 | 76.56 | 91.27 | 116.40 | 97.63 | 80.02 | 86.84 | 84.44 | 80.70 | 82.71 |
| 10 | 85.98 | 96.94 | 101.48 | 90.13 | 108.51 | 80.55 | 87.36 | 94.49 | 96.44 | 98.35 | 76.74 | 82.84 | 73.37 | 117.18 | 77.10 |
| RSD (%) | 0.1 | 7.17 | 1.25 | 4.71 | 4.34 | 6.57 | 3.05 | 9.56 | 4.12 | 5.20 | 11.11 | 4.86 | 10.43 | 6.84 | 5.37 | 0.93 |
| 1 | 6.90 | 2.00 | 5.94 | 1.87 | 0.63 | 1.61 | 1.47 | 5.31 | 3.04 | 9.18 | 3.57 | 5.02 | 3.92 | 2.88 | 7.43 |
| 10 | 4.86 | 4.81 | 3.82 | 11.04 | 3.12 | 4.82 | 5.31 | 5.88 | 2.25 | 7.46 | 1.71 | 1.13 | 0.83 | 3.87 | 0.05 |
| Sandy loam soil | 0.1 | 108.68 | 98.69 | 110.38 | 105.76 | 116.63 | 106.53 | 109.73 | 116.19 | 107.41 | 95.45 | 96.49 | 98.46 | 100.28 | 100.57 | 80.96 |
| 1 | 76.19 | 84.13 | 81.12 | 85.67 | 85.78 | 84.42 | 80.43 | 81.85 | 91.43 | 85.82 | 108.70 | 102.26 | 91.37 | 75.90 | 87.93 |
| 10 | 83.43 | 87.65 | 86.23 | 82.59 | 102.26 | 91.07 | 72.09 | 83.72 | 88.59 | 97.41 | 78.56 | 84.95 | 74.35 | 117.57 | 82.69 |
| RSD (%) | 0.1 | 1.79 | 2.48 | 3.51 | 7.22 | 5.14 | 2.69 | 3.62 | 2.20 | 7.33 | 5.01 | 6.85 | 1.74 | 3.33 | 1.58 | 4.53 |
| 1 | 1.38 | 0.92 | 3.53 | 1.63 | 1.69 | 0.70 | 6.57 | 4.83 | 11.69 | 3.90 | 4.02 | 2.68 | 2.50 | 1.97 | 4.47 |
| 10 | 3.81 | 7.07 | 5.58 | 3.02 | 1.80 | 5.54 | 3.21 | 3.35 | 7.86 | 4.62 | 0.09 | 0.19 | 0.14 | 2.55 | 0.32 |
| Paddy soil | 0.1 | 113.00 | 100.18 | 113.19 | 105.29 | 113.75 | 110.65 | 97.87 | 109.02 | 109.61 | 101.93 | 96.49 | 98.46 | 100.28 | 100.57 | 80.96 |
| 1 | 72.10 | 96.96 | 104.54 | 101.07 | 108.56 | 107.86 | 84.46 | 96.94 | 109.80 | 89.82 | 109.76 | 98.04 | 107.57 | 106.16 | 86.17 |
| 10 | 87.68 | 84.27 | 89.03 | 84.46 | 99.68 | 85.60 | 83.57 | 75.64 | 78.64 | 97.17 | 72.73 | 82.61 | 72.26 | 109.44 | 56.81 |
| RSD (%) | 0.1 | 1.22 | 3.00 | 0.37 | 5.24 | 5.39 | 2.83 | 3.83 | 2.56 | 9.27 | 1.91 | 1.97 | 2.87 | 1.71 | 0.91 | 6.20 |
| 1 | 5.31 | 4.52 | 8.37 | 6.62 | 9.44 | 5.07 | 3.88 | 4.27 | 7.53 | 4.64 | 4.36 | 3.90 | 12.35 | 10.40 | 3.58 |
| 10 | 1.69 | 6.63 | 7.82 | 3.35 | 6.82 | 6.98 | 6.88 | 3.73 | 8.71 | 9.50 | 1.72 | 1.50 | 0.66 | 1.74 | 0.17 |
